# Supplementary material for: Fate of terrigenous organic matter across the Laptev Sea from the mouth ofthe Lena River to the deep sea of the Arctic interior
Source: Copernicus journal article supplement (doi:10.5194/bg-13-5003-2016), 2016-09-09
Supplement: Supplementary file 1 [file bg-13-5003-2016-supplement.pdf]

Supplement of Biogeosciences, 13, 5003–5019, 2016  
<http://www.biogeosciences.net/13/5003/2016/>  
doi:10.5194/bg-13-5003-2016-supplement  
© Author(s) 2016. CC Attribution 3.0 License.

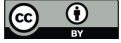

Biogeosciences  Open Access

*Supplement of*

## **Fate of terrigenous organic matter across the Laptev Sea from the mouth of the Lena River to the deep sea of the Arctic interior**

**Lisa Bröder et al.**

*Correspondence to:* Lisa Bröder ([lisa.broder@aces.su.se](mailto:lisa.broder@aces.su.se))

The copyright of individual parts of the supplement might differ from the CC-BY 3.0 licence.

1 **Supplementary Information**

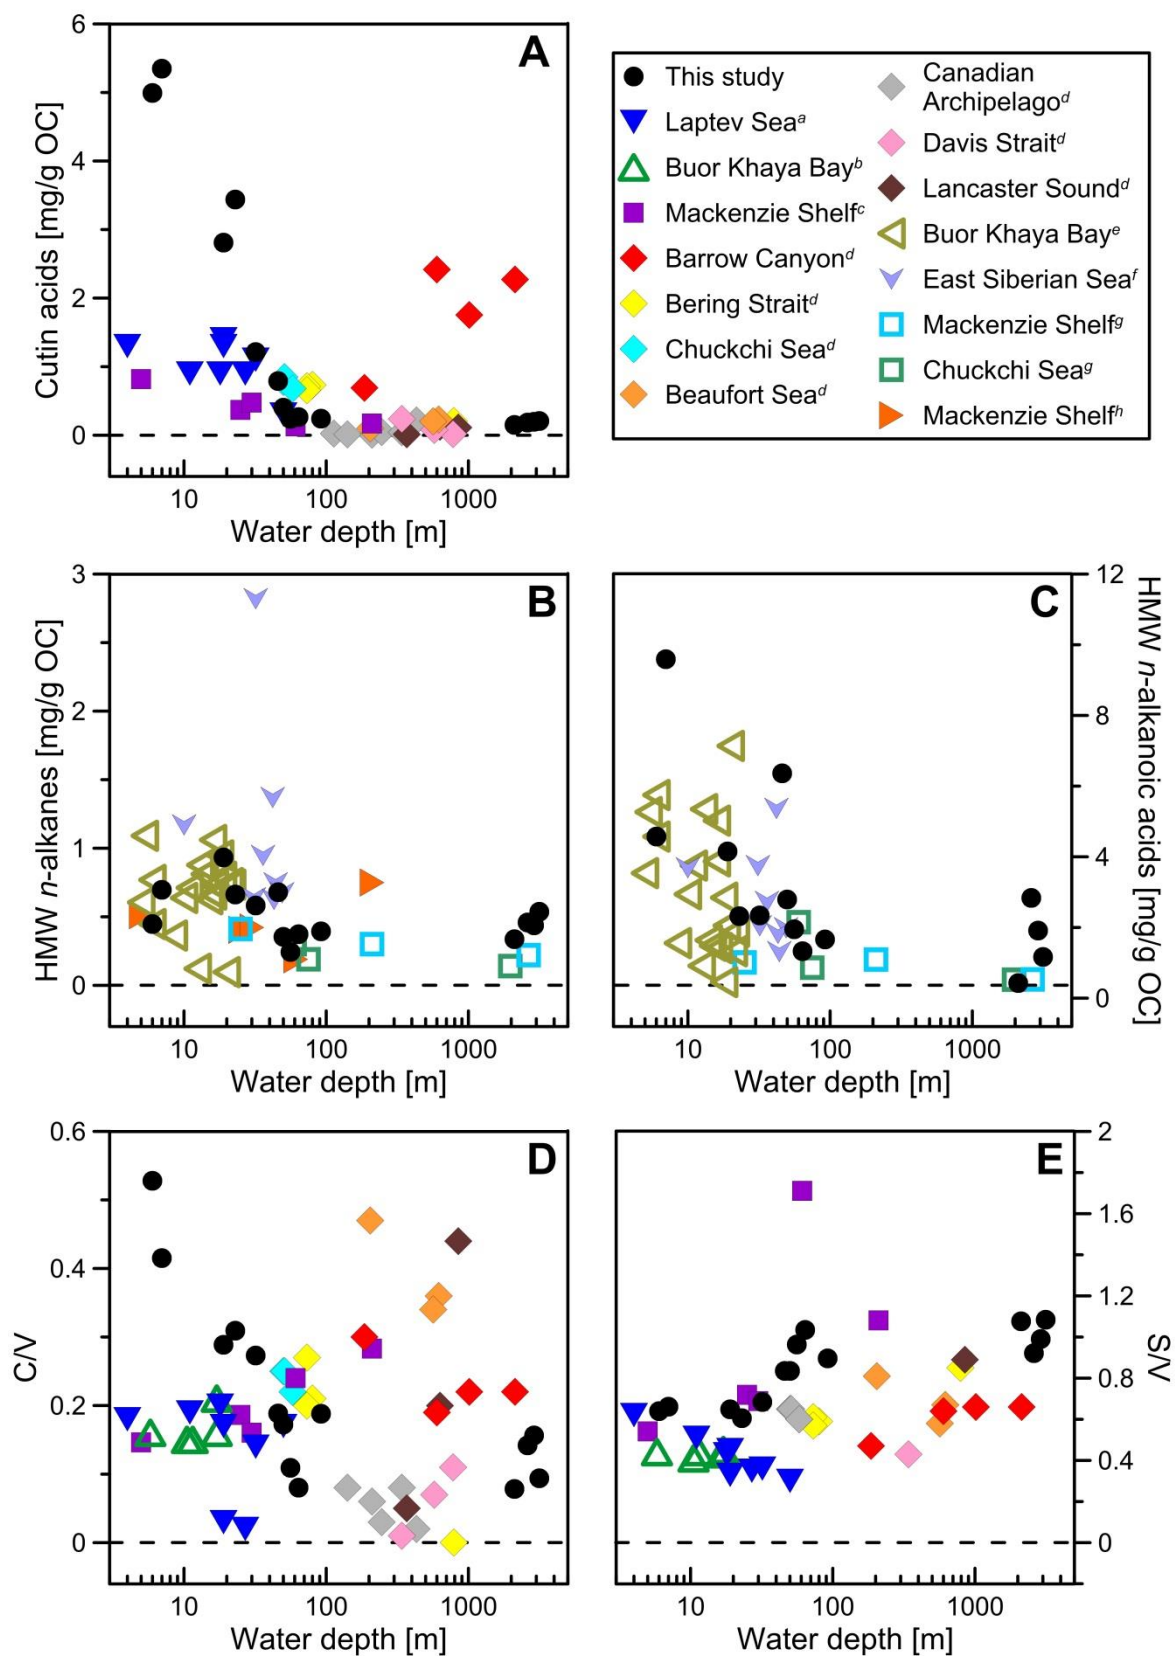

2

3 Figure S1: A comparison of biomarker concentrations and ratios measured in this study to  
 4 literature values from different studies on Arctic margins: <sup>a</sup> Tesi et al. (2014), <sup>b</sup> Winterfeld et

5 al. (2015a), <sup>c</sup> Goñi et al. (2000), <sup>d</sup> Goni et al. (2013), <sup>e</sup> Karlsson et al. (2011), <sup>f</sup> Vonk et al.  
6 (2010), <sup>g</sup> Belicka et al. (2004), <sup>h</sup> Yunker et al. (1993).

7

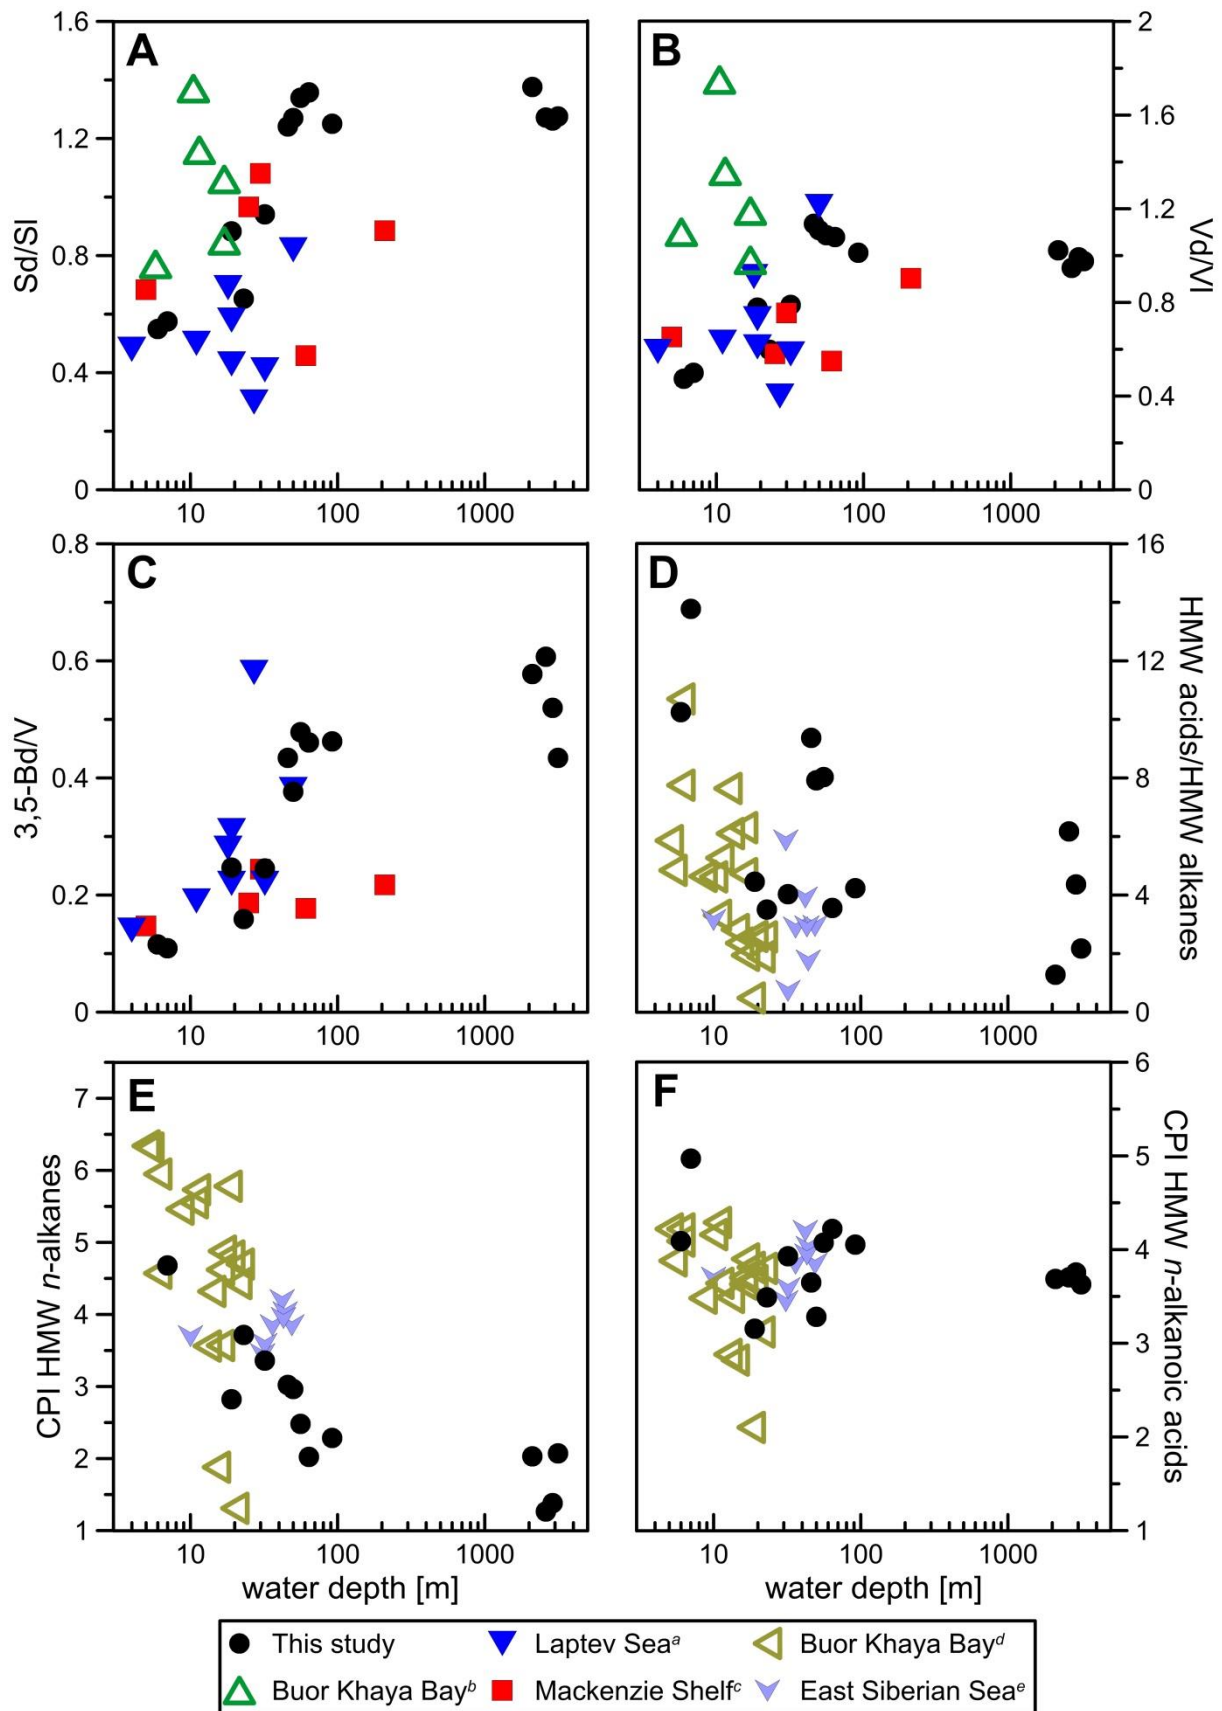

8

9 Figure S2: A comparison of the degradation proxies measured in this study to literature  
 10 values from different studies on Arctic margins: <sup>a</sup> Tesi et al. (2014), <sup>b</sup> Winterfeld et al. (2015a),  
 11 <sup>c</sup> Goñi et al. (2000), <sup>d</sup> Karlsson et al. (2011), <sup>e</sup> Vonk et al. (2010).
